# Supplementary material for: Reduced DNA methylation by Mn3O4 nanozyme protein corona formation improves cotton yield in saline land
Source: Research Square preprint supplement (doi:10.21203/rs.3.rs-6845368/v1), 2025-07-16
Supplement: Supplementary file 2 [file a285e239f7ad19c5ea036f04.xlsx]

## Sheet: Supplementary Table 2.
Supplementary Table 2. Primer sequences for bisulfite sequencing and qRT-PCR.
	Gene name	primer sequence
qRT-PCR	GhCMT1F	ATGATGGCCAAGGATGCGAA
	GhCMT1R	TAACACCTTGACATGGGGGC
	GhCMT2F	CTTACCAGGCAGCACTCACA
	GhCMT2R	ACCAGAGACCTCGAGCTCAT
	GhCMT3F	TTACCAAGTCCGAATGGGAATGAT
	GhCMT3R	TCATCCGTGTTGAGTTGAAGTGG
	GhDRM1F	GCGGTGGAGAAGTAGCACTT
	GhDRM1R	CAGCCTCTAGAATCCGGCAG
	GhDRM2F	TCACCAATGATGAGCCGCTT
	GhDRM2R	GTATCCCATGTTGGCCACCA
	GhDRM3-F	TACGACGGTTGGGTCAAGATTTC
	GhDRM3-R	CCTATTTTCAGCGGGAAGATTGTG
	GhDNMT1F(GhMET1)	TGTAGGGCTGACTTGTGAAAAA
	GhDNMT1F(GhMET1)R	AACCAGAGATGCCCCAAGACT
	GhDDM1-F	TCTGTTGAGTGCCGCATTTTG
	GhDDM1-R	TGTCCTCAGCAGTTTCTTCATCCC
	GhNERD-F	CTTGGATTGTATTCCCAGGAGCAGA
	GhNERD-R	GGACCATCTAGTCAGGGATCAGCAT
	GhDMEF	ATGCTGCTTCTATCCCTACTCCA
	GhDMER	GATCATCAGGTTCCCGCTTTT
	GhROS1F	CAACAGTTACAAGCCGCATCCAC
	GhROS1R	AAGGTACTTGCACGGGTCGTCAG
	GhSAM1L-L	GAGATCACGACCAAGGCCAA
	GhSAM1L-R	CGCGGCAATCTTCTCATTGG
	GhSAM1-L	TATGCCACAGACGAAACCCC
	GhSAM1-R	ACCCCAGCCACCATAGGTAT
	GhSAM2L-L	GCTGACCTCAAGGAGCATGT
	GhSAM2L-R	GTGTCCGTAAGCAGCTGTCT
	GhSAM3L-L	AGACATGCCCATGGTTGAGG
	GhSAM3L-R	GGCCACAACACTCTTTGCTG
	GhSAM4-L	CCTCACCAAGAAGCCTGAGG
	GhSAM4-R	TCTCCATGAGGTCCACCGAT
	GhSAM4L-L	CGATTCGGCCGTTGATTCAC
	GhSAM4L-R	GAGTACCGATCACCGTCGAC
	GhSAM2-L	CCAGGGCCATATGTTTGGGT
	GhSAM2-R	AGCCCATTAGCCACAATGCT
	GhUBQ7-F	GAAGGCATTCCACCTGACCAAC
	GhUBQ7-R	CTTGACCTTCTTCTTCTTGTGCTTG
	GhHistone3-F	TCAAGACTGACTGATTTGCGTTT
	GhHistone3-R	GCGCAAAGGGTTGGTGTCTTC
Clon	2300-S2-F	GAGCTCGGTACCCGGGGATCC atggagacctttctattcacatctg
	2300-S2-R	GGTGTCGACTCTAGAGGATCC agactgaggcttctcccacttg
	Pet30a-S2-F	GTGCGGCCGCAAGCTatggagacctttctattcacatctgaatcag
	Pet30a-S2-R	AAGGAGATATACATAttaagactgaggcttctcccacttg
	PY156-S2-F	gtgagtaaggttaccgaattc ccagggccatatgtttgggt
	PY156-S2-R	gagacgcgtgagctcggtacc cgtgaggaccaccaatgaca
